# Supplementary material for: The magmatic–hydrothermal transition record in zircon: implications for zircon texture, composition and rare-metal granite dating (Beauvoir granite, French Massif Central)
Source: Copernicus journal article supplement (doi:10.5194/ejm-37-667-2025), 2025-10-07
Supplement: Supplementary file 1 [file Supplementary materials.xlsx]

## Sheet: Supplementary materials
Title: The magmatic-hydrothermal transition record in zircon: Implications for zircon texture, composition and rare-metal granite (Beauvoir granite, French Massif central)
Journal: European Journal of Mineralogy
Authors: Nicolas Esteves1*, Pierre Bouilhol1, Urs Schaltegger2, Maria Ovtcharova2, André Navin Paul2,3, Lydéric France1,4
Co-authors (alphabetic number):
1 Université de Lorraine, CNRS, CRPG, 54000 Nancy, France
2 Department of Earth Sciences, Université de Genève, 1200, Switzerland
3 Institute of Geosciences, Goethe University, Frankfurt am Main, Germany
4 Institut Universitaire de France (IUF), France
* Corresponding author: nicolas.esteves@univ-lorraine.fr
Supplement Table S1
1. Zircon in-situ analyses (electron probe micro-analyses and µ-Raman) - Structural formulas based on 4 oxygens
2: Micas and quartz inclusions in zircon (SEM analyses) - Structural formulas based on 22 oxygens for micas
3: U-Pb istopic results and ages of Beauvoir zircons (ID-TIMS)
4: U-Pb isotopic results and ages of Beauvoir apatites (ID-TIMS)
5: Zircon α-decay damage models

## Sheet: Zircon EPMA & µ-Raman
Zr name	Sample	Sub-unit		Analyse N°	BSE signal		SiO2*	Al2O3*	FeO*	MnO*	CaO*	P2O5*	ZrO2*	HfO2*	ThO2*	UO2*	F *	Total		Si	P	Al	T-site		Zr	Hf	Th	U	Fe	Mn	Ca	A-site		F		α-dose (1016/mg)		ν3 (SiO4) peak position (cm-1)		ν3 (SiO4) linewidth (cm-1)
Zr-1	GPF-680.60	U2c		1	Zone 1		31.1	0.02	0	0	0	0.16	58.07	7.33	0	0.42	0.22	97.32		1.00105	0.0043598	0.000758673	1.00617		0.911385	0.0673437	0	0.00300789	0	0	0	0.981737		0.0223939		0.389637		994.679		24.7208
Zr-1	GPF-680.60	U2c		2	Zone 1		31.98	0.07	0	0	0.07	0.04	60.62	7.31	0.08	0.47	0.19	100.83		0.99643	0.00105507	0.00257037	1.00006		0.920958	0.0650106	0.000567177	0.00325825	0	0	0.00233673	0.992131		0.0187212		0.453196		995.678		21.7435
Zr-1	GPF-680.60	U2c		3	Zone 2		20.7	2.15	0.72	0.29	2.09	5.44	45.02	3.58	0.04	7.2	1.84	89.07		0.721331	0.160478	0.0882943	0.970103		0.764937	0.0356078	0.000317164	0.0558232	0.0209797	0.00855888	0.0780284	0.964252		0.202766		6.68809
Zr-1	GPF-680.60	U2c		4	Zone 1		31.19	1.61	0.29	0.07	0.31	0.56	60.27	5.45	0	0.54	0.46	100.75		0.955096	0.0145168	0.0581016	1.02771		0.899889	0.0476351	0	0.00367912	0.00742562	0.00181545	0.0101703	0.970614		0.0445454		0.500962
Zr-1	GPF-680.60	U2c		5	Zone 2		26.3	0.97	2.1	0.28	0.72	0.77	55.5	3.35	0	1.85	1.66	93.5		0.870741	0.0215812	0.0378473	0.93017		0.895947	0.0316575	0	0.0136277	0.0581374	0.00785138	0.0255392	1.03276		0.173802		1.71626		994.921		26.2463
Zr-1	GPF-680.60	U2c		6	Zone 1		28.6	0.27	1.38	0.23	0.27	0.46	60.88	4.46	0.08	1.02	0.9	98.55		0.911261	0.0124076	0.0101384	0.933807		0.945817	0.0405611	0.000579998	0.00723094	0.0367671	0.00620668	0.00921685	1.04638		0.0906843		0.963436		995.356		31.0261
Zr-1	GPF-680.60	U2c		7	Zone 2		17.62	1.9	0.64	0.45	3.16	7.46	49	4.03	0	4.73	3	91.99		0.585552	0.20987	0.074412	0.869834		0.793983	0.0382264	0	0.0349735	0.0177845	0.0126656	0.112509	1.01014		0.315278		4.38806
Zr-1	GPF-680.60	U2c		8	Zone 2		23.34	1.56	1.94	0.43	1.06	1.29	50.01	3.37	0	3.55	1.82	88.37		0.823878	0.0385482	0.0648958	0.927322		0.860745	0.033954	0	0.027881	0.0572621	0.0128554	0.0400876	1.03279		0.203164		3.29336
Zr-1	GPF-680.60	U2c		9	Zone 1		27.07	0.38	1.61	0.47	0.72	0.97	54.02	3.82	0	3.51	1.51	94.08		0.898012	0.0272407	0.0148562	0.940109		0.873784	0.0361706	0	0.0259071	0.0446604	0.0132052	0.0255899	1.01932		0.15841		3.25626		994.555		29.78
Zr-1	GPF-680.60	U2c		10	Zone 2		23.64	1.71	2	0.48	1.35	1.57	50.34	2.92	0	3.29	1.98	89.28		0.817753	0.0459755	0.0697109	0.93344		0.849071	0.0288308	0	0.0253215	0.0578506	0.0140628	0.0500323	1.02517		0.216597		3.05216		994.02		31.0152
Zr-1	GPF-680.60	U2c		11	Zone 1		31.12	0.08	0.16	0.04	0.05	0.18	61.85	4.97	0.04	0.57	0	99.06		0.984751	0.00482182	0.00298337	0.992556		0.954294	0.0448892	0.00028801	0.0040131	0.0042336	0.00107202	0.00169511	1.01048		0		0.53738		994.78		21.15
Zr-1	GPF-680.60	U2c		12	Zone 1		28.35	0.45	1.72	0.32	0.5	0.24	58.14	3.27	0	1.11	1.26	95.36		0.919777	0.00659163	0.0172057	0.943575		0.91973	0.0302814	0	0.00801255	0.0466618	0.00879294	0.0173797	1.03086		0.129275		1.02976		994.25		33.3
Zr-1	GPF-680.60	U2c		13	Zone 1		30.02	0.05	0.49	0.06	0.05	0.27	62.43	3.37	0	0.69	0.3	97.73		0.958538	0.00729818	0.00188148	0.967718		0.971959	0.0307133	0	0.00490191	0.0130827	0.00162257	0.00171045	1.02399		0.0302923		0.640119		994.87		26.66
Zr-1	GPF-680.60	U2c		14	Zone 2		23.17	1.36	1.71	0.49	1.23	1.58	51.49	2.52	0	3.66	1.86	89.07		0.810055	0.0467625	0.0560347	0.912852		0.877742	0.0251471	0	0.02847	0.0499905	0.0145091	0.0460718	1.04193		0.205643		3.39541		994.369		26.0564
Zr-1	GPF-680.60	U2c		15	Zone 1		29.67	0.27	0.51	0.15	0.29	0.58	61.61	3.4	0.01	0.92	0.25	97.66		0.948413	0.0156949	0.0101712	0.974279		0.960255	0.0310211	7.27344e-05	0.00654313	0.0136318	0.00406093	0.00993161	1.02552		0.0252716		0.855638		994.966		22.5143
Zr-1	GPF-680.60	U2c		16	Zone 1		-	-	-	-	-	-	-	-	-	-	-	-		-	-	-	-		-	-	-	-	-	-	-	-		-		-		994.97		22.9
Zr-1	GPF-680.60	U2c		17	Zone 2		-	-	-	-	-	-	-	-	-	-	-	-		-	-	-	-		-	-	-	-	-	-	-	-		-		-		994.68		24.97
Zr-1	GPF-680.60	U2c		18	Zone 2		-	-	-	-	-	-	-	-	-	-	-	-		-	-	-	-		-	-	-	-	-	-	-	-		-		-		994.43		31.78
Zr-2	GPF-598.05	U2e		1	Zone 1		30.03	0.02	0.03	0.04	0	0	61.2	9.99	0.01	0.58	0.08	101.98		0.952925	0	0.000747934	0.953673		0.946914	0.0904831	7.22044e-05	0.00409496	0.000796027	0.00107502	0	1.04344		0.00802798		0.540217
Zr-2	GPF-598.05	U2e		2	Zone 2		22.07	1.68	0.8	0.43	1.99	1.98	49.13	3.27	0	4.1	1.52	86.97		0.796219	0.060471	0.0714281	0.928118		0.864236	0.0336726	0	0.0329103	0.0241337	0.0131387	0.0769175	1.04501		0.173415		3.8036
Zr-2	GPF-598.05	U2e		3	Zone 1		27.31	0.55	0.6	0.19	0.74	0.94	59.71	4.07	0	0.98	0.65	95.74		0.894821	0.0260732	0.0212377	0.942132		0.953932	0.0380634	0	0.00714428	0.0164388	0.00527258	0.025977	1.04683		0.0673505		0.909154
Zr-2	GPF-598.05	U2e		4	Zone 1		32.36	0.05	0	0	0.03	0.07	63.24	3.9	0.03	0.27	0.05	100		1.00203	0.00183495	0.00182462	1.00569		0.954819	0.0344696	0.000211376	0.00186018	0	0	0.00099526	0.992355		0.00489617		0.256921
Zr-2	GPF-598.05	U2e		5	Zone 2		25.61	1.49	1.08	0.39	1.65	1.69	48.92	3.82	0	2.55	1.54	88.74		0.88065	0.0491963	0.0603824	0.990229		0.820231	0.0374935	0	0.0195098	0.0310542	0.0113583	0.0607883	0.980435		0.167466		2.36566
Zr-2	GPF-598.05	U2e		6	Zone 1		32.86	0.03	0	0	0.06	0.19	62.36	4.65	0	0.2	0	100.35		1.01267	0.00495686	0.00108956	1.01872		0.93705	0.0409028	0	0.00137135	0	0	0.00198105	0.981306		0		0.185542		996.26		16.56
Zr-2	GPF-598.05	U2e		7	Zone 1		32.19	0.04	0	0	0.01	0.01	64.67	4.4	0.09	0.3	0.08	101.79		0.986766	0.000259505	0.00144505	0.988471		0.966611	0.0384986	0.000627763	0.00204613	0	0	0.000328424	1.00811		0.00775526		0.297632		994.9		20.66
Zr-2	GPF-598.05	U2e		8	Zone 1		31.81	0.06	0	0	0.05	0.11	63.16	4.82	0	0.27	0.14	100.42		0.986974	0.00288926	0.00219393	0.992057		0.95552	0.0426862	0	0.0018639	0	0	0.00166209	1.00173		0.0137367		0.250481		998.06		14.69
Zr-2	GPF-598.05	U2e		9	Zone 1		29.92	0.22	0.1	0.08	0.55	1.25	59.44	6.77	0.04	0.29	0.87	99.53		0.932501	0.0329799	0.00808054	0.973561		0.90328	0.0602247	0.000283666	0.00201096	0.0026061	0.0021117	0.0183651	0.988882		0.0857472		0.277622		997.42		16.49
Zr-2	GPF-598.05	U2e		10	Zone 2		25.27	1.65	1.14	0.44	1.34	0.84	51.49	2.47	0	2.19	1.36	88.19		0.879771	0.0247569	0.0676984	0.972226		0.874063	0.0245448	0	0.0169639	0.0331873	0.0129739	0.0499817	1.01171		0.149732		2.03168		995.27		26.32
Zr-2	GPF-598.05	U2e		11	Zone 2		26	1.41	1.03	0.34	1.1	0.5	53.53	2.48	0.08	1.98	0.87	89.32		0.903057	0.0147016	0.0577153	0.975473		0.906556	0.0245862	0.000632254	0.0153012	0.0299145	0.0100017	0.0409333	1.02793		0.0955595		1.85404		994.6		25.65
Zr-2	GPF-598.05	U2e		12	Zone 2		24.2	1.54	0.89	0.41	1.63	1.57	51.37	2.15	0	3.62	1.51	88.89		0.841803	0.0462324	0.0631314	0.951166		0.871285	0.0213468	0	0.028017	0.0258874	0.0120791	0.060747	1.01936		0.166106		3.3583		994.13		26.85
Zr-2	GPF-598.05	U2e		13	Zone 1		32.6	0.13	0	0	0.01	0.15	62.93	3.72	0.08	0.27	0.39	100.28		0.998165	0.00388802	0.00469092	1.00674		0.939504	0.0325107	0.000557359	0.00183936	0	0	0.00032804	0.974739		0.0377626		0.267654		996.18		20.72
Zr-2	GPF-598.05	U2e		14	Zone 1		-	-	-	-	-	-	-	-	-	-	-	-		-	-	-	-		-	-	-	-	-	-	-	-		-		-		995.95		21.77
Zr-2	GPF-598.05	U2e		15	Zone 2		-	-	-	-	-	-	-	-	-	-	-	-		-	-	-	-		-	-	-	-	-	-	-	-		-		-		995.79		25.09
Zr-2	GPF-598.05	U2e		16	Zone 2		-	-	-	-	-	-	-	-	-	-	-	-		-	-	-	-		-	-	-	-	-	-	-	-		-		-		992.69		29.97
Zr-3	GPF-680.60	U2c		1	Zone 1		29.11	0.06	0.22	0.01	0.05	0.1	63.18	3.51	0	0.71	0	96.95		0.948862	0.00275939	0.00230485	0.953927		1.00414	0.0326563	0	0.00514917	0.00599635	0.000276068	0.00174612	1.04997		0		0.658673		991.18		35.89
Zr-3	GPF-680.60	U2c		2	Zone 2		17.26	1.35	0.51	0.75	3.08	8.01	52.38	2.91	0.03	2.75	3.24	92.27		0.563846	0.221516	0.0519737	0.837335		0.834336	0.0271338	0.000222998	0.019988	0.0139313	0.0207508	0.107798	1.02416		0.334717		2.55764
Zr-3	GPF-680.60	U2c		3	Zone 1		26.13	0.51	0.37	0.18	0.77	1.75	59.96	3.72	0.03	1.53	0.94	95.89		0.853819	0.048408	0.0196393	0.921867		0.955309	0.0346951	0.000223053	0.0111234	0.0101095	0.00498143	0.0269562	1.0434		0.0971331		1.42583
Zr-3	GPF-680.60	U2c		4	Zone 1		29.43	0.11	0.14	0	0.18	0.41	63.81	4.08	0	0.64	0.11	98.91		0.938605	0.0110695	0.00413443	0.953809		0.992286	0.0371408	0	0.00454141	0.00373356	0	0.00615045	1.04385		0.0110943		0.593733
Zr-3	GPF-680.60	U2c		5	Zone 2		22.45	0.79	0.28	1.07	1.54	4.43	53.86	3.24	0	2.16	1.17	90.99		0.764279	0.127671	0.0316951	0.923645		0.894041	0.0314832	0	0.0163609	0.0079707	0.0308513	0.0561692	1.03688		0.12596		2.00385
Zr-3	GPF-680.60	U2c		6	Zone 1		30.67	0.06	0.38	0.08	0.15	0.26	61.27	3.34	0	0.75	0.11	97.07		0.982381	0.00705004	0.00226489	0.991696		0.956908	0.0305359	0	0.00534497	0.0101778	0.00217026	0.00514754	1.01028		0.0111422		0.695781
Zr-3	GPF-680.60	U2c		7	Zone 2		19.06	1.86	0.35	0.61	2.83	7.16	45.66	2.13	0	6.78	3.08	89.52		0.641198	0.203908	0.0737416	0.918848		0.748964	0.0204525	0	0.0507478	0.00984556	0.0173802	0.101999	0.94939		0.327667		6.28986
Zr-3	GPF-680.60	U2c		8	Zone 1		32.81	0.02	0.07	0.01	0.02	0.17	62.6	3.15	0	0.47	0.5	99.82		1.00384	0.00440309	0.000721135	1.00896		0.93387	0.0275084	0	0.00319943	0.00179084	0.000259126	0.000655584	0.967284		0.048377		0.436023
Zr-3	GPF-680.60	U2c		9	Zone 1		32.12	0.09	0.06	0.04	0.21	0.67	59.44	3.79	0	0.33	0.25	97		1.01013	0.0178372	0.00333559	1.0313		0.911455	0.0340203	0	0.00230904	0.00157781	0.00106541	0.00707558	0.957503		0.024863		0.306144
Zr-3	GPF-680.60	U2c		10	Zone 2		20.33	1.22	0.35	1.05	2.14	7	49.22	2.63	0	2.95	2.54	89.43		0.677944	0.197609	0.0479453	0.923498		0.800302	0.0250329	0	0.0218875	0.0097595	0.0296552	0.0764561	0.963093		0.267857		2.73674
Zr-3	GPF-680.60	U2c		11	Zone 2		25.91	0.72	1	0.44	1.21	2.33	54.44	2.62	0	2.77	1.26	92.7		0.861292	0.0655678	0.0282063	0.955066		0.882382	0.0248589	0	0.0204871	0.0277962	0.0123877	0.0430933	1.01101		0.132454		2.56975
Zr-4	GPF-680.60	U2c		1	Zone 1		30.6	0.08	0	0	0.18	0.42	63.97	4.37	0	0.24	0	99.86		0.960701	0.0111627	0.00295997	0.974823		0.979262	0.0391604	0	0.00167647	0	0	0.00605454	1.02615		0		0.22265
Zr-4	GPF-680.60	U2c		2	Zone 2		16.61	1.69	0.29	0.65	3.69	9.94	48.63	2.84	0.05	4.22	3.49	92.1		0.535926	0.271503	0.0642617	0.871691		0.76506	0.0261549	0.000367084	0.0302946	0.00782414	0.0177625	0.127557	0.97502		0.356101		3.92566
Zr-4	GPF-680.60	U2c		3	Zone 1		30.87	0.05	0	0.01	0.16	0.54	63.82	3.61	0	0.63	0.06	99.75		0.965305	0.0142947	0.00184259	0.981442		0.973062	0.0322206	0	0.00438315	0	0.000264839	0.00536031	1.01529		0.00593324		0.584456
Zr-4	GPF-680.60	U2c		4	Zone 1		30.37	0.19	0.04	0.08	0.34	1.08	63.67	3.58	0.03	0.7	0.36	100.44		0.938619	0.0282566	0.00692035	0.973796		0.959479	0.031581	0.000210973	0.0048135	0.00103373	0.00209406	0.0112581	1.01047		0.0351852		0.655836
Zr-4	GPF-680.60	U2c		5	Zone 1		30.98	0.04	0.03	0.04	0.07	0.08	63.21	6.52	0	0.29	0.24	101.5		0.963719	0.00210674	0.00146642	0.967292		0.958761	0.0578915	0	0.00200717	0.000780357	0.00105386	0.00233297	1.02283		0.0236098		0.269035
Zr-4	GPF-680.60	U2c		6	Zone 1		31.32	0.03	0.04	0.06	0.02	0.13	61.11	7.46	0	0.62	0.05	100.84		0.983669	0.00345639	0.0011104	0.988236		0.935827	0.0668751	0	0.00433248	0.00105049	0.001596	0.000672976	1.01035		0.00496604		0.575179		992.61		34.08
Zr-4	GPF-680.60	U2c		7	Zone 1		31.78	0.06	0	0.01	0.06	0.16	63.58	3.29	0.03	0.31	0.3	99.58		0.984984	0.00419805	0.00219158	0.991373		0.960841	0.0291051	0.000211571	0.00213774	0	0.0002625	0.00199236	0.99455		0.0294042		0.294029
Zr-4	GPF-680.60	U2c		8	Zone 1		31.49	0.02	0	0.01	0.02	0.11	64.78	3.88	0.1	0.12	0.33	100.86		0.970358	0.00286949	0.000726306	0.973954		0.973321	0.0341263	0.000701164	0.000822732	0	0.000260984	0.000660285	1.00989		0.0321578		0.132791
Zr-4	GPF-680.60	U2c		9	Zone 2		19.83	2.69	0.34	0.45	2.26	6.03	47.89	2.04	0	5.8	2.24	89.57		0.673377	0.173342	0.107651	0.95437		0.792932	0.0197726	0	0.0438209	0.00965423	0.012942	0.0822216	0.961344		0.240545		5.38071		993.96		19.9
Zr-4	GPF-680.60	U2c		10	Zone 2		23.48	1.69	1.03	0.39	1.73	3.28	52.3	2.58	0	3.41	1.91	91.8		0.782884	0.0925817	0.0664074	0.941873		0.85027	0.0245537	0	0.0252972	0.0287171	0.0110133	0.0617999	1.00165		0.201394		3.16348
Zr-4	GPF-680.60	U2c		11	Zone 2		19.37	2.02	0.5	0.31	2.33	7.52	39.05	2.97	0.01	7.8	2.11	83.99		0.695966	0.228733	0.0855342	1.01023		0.684124	0.0304588	8.17558e-05	0.0623549	0.0150221	0.00943354	0.0896925	0.891168		0.239747		7.23827		990.78		36.27
Zr-4	GPF-680.60	U2c		12	Zone 1		29.15	0.09	0.02	0.12	0.26	0.5	61.9	3.45	0	0.79	0.52	96.8		0.93848	0.0136273	0.00341475	0.955522		0.971702	0.0317033	0	0.00565889	0.000538418	0.00327207	0.00896813	1.02184		0.0529423		0.732889
Zr-5	GPF-598.05	U2e		1	Zone 2		31.58	0.09	0	0.02	0	0.12	64.22	3.41	0	0.63	0.19	100.26		0.978891	0.00314887	0.00328772	0.985327		0.970618	0.03017	0	0.00434491	0	0.000525057	0	1.00566		0.0186247		0.584456
Zr-5	GPF-598.05	U2e		2	Zone 2		31.56	0.09	0	0.11	0.11	0.21	61.29	3.35	0	1.12	0.74	98.58		0.982761	0.00553583	0.00330281	0.9916		0.930586	0.0297752	0	0.00775974	0	0.00290107	0.00366983	0.974692		0.0728711		1.03903
Zr-5	GPF-598.05	U2e		3	Zone 1		30.34	0.09	0	0.11	0.01	0.33	58.09	2.9	0	5.44	0.19	97.5		0.986933	0.00908737	0.0034502	0.999471		0.92136	0.0269258	0	0.0393721	0	0.00303054	0.000348509	0.991037		0.0195451		5.04673
Zr-5	GPF-598.05	U2e		4	Zone 1		30.02	0	0	0.08	0.05	0.34	61.49	3.06	0	4.68	0.8	100.52		0.943995	0.00905086	0	0.953046		0.942799	0.0274649	0	0.0327433	0	0.00213061	0.0016845	1.00682		0.0795539		4.34167
Zr-5	GPF-598.05	U2e		5	UO2 exsholution		8.16	0.04	0.07	0.06	0.12	0.04	10.73	0.71	0.21	75.59	0.09	95.82
Zr-5	GPF-598.05	U2e		6	Zone 2		27.44	0.68	0.1	0.75	1.06	2.45	57.81	3.07	0	4.1	0.22	97.68		0.886809	0.0670292	0.0258991	0.979737		0.910971	0.0283193	0	0.0294814	0.0027024	0.0205287	0.0367023	1.02871		0.0224844		3.8036
Zr-5	GPF-598.05	U2e		7	UO2 exsholution		5.52	0.18	0	0.17	0.27	0.11	9.52	0.88	0.29	82.62	0.25	99.81
Zr-5	GPF-598.05	U2e		8	Zone 2		31	0.03	0.04	0	0.02	0.11	64.84	3.36	0	0.45	0.44	100.29		0.960635	0.00288564	0.00109559	0.964616		0.979705	0.029719	0	0.00310261	0.00103648	0	0.000664001	1.01423		0.0431184		0.417469
Zr-5	GPF-598.05	U2e		9	Zone 1		30.24	0.01	0.04	0.06	0.24	0.34	59.05	3.29	0.04	2.75	0.72	96.78		0.971253	0.00924446	0.000378513	0.980876		0.924755	0.030161	0.000292328	0.0196518	0.00107427	0.00163214	0.00825856	0.985825		0.0731301		2.55978
Zr-6	GPF-680.60	U2c		1	Zone 1		26.62	0.4	0.56	0.25	0.63	1.2	60.33	3.64	0.02	1.15	1.29	96.09		0.863216	0.0329416	0.0152863	0.911444		0.953895	0.0336908	0.000147571	0.00829712	0.0151846	0.00686604	0.0218874	1.03997		0.132286		1.07116
Zr-6	GPF-680.60	U2c		2	Zone 2		16.83	1.96	0.69	0.58	3.61	8.11	47.49	2.64	0	5.55	2.75	90.21		0.569499	0.232318	0.0781619	0.879979		0.78355	0.0254983	0	0.041785	0.0195237	0.0166223	0.130875	1.01786		0.294276		5.14878		993.16		40.28
Zr-6	GPF-680.60	U2c		3	Zone 1		29.96	0.02	0	0.06	0.01	0.18	63.64	3.65	0.08	0.52	0.17	98.29		0.956062	0.00486261	0.00075215	0.961677		0.990217	0.0332457	0.000580891	0.00369203	0	0.00162162	0.00034189	1.0297		0.0171556		0.499581
Zr-6	GPF-680.60	U2c		4	Zone 1		30.55	0.01	0	0	0.03	0.04	65.83	3.69	0	0.61	0.22	100.98		0.950941	0.00105403	0.000366836	0.952361		0.99913	0.0327844	0	0.00422464	0	0	0.00100047	1.03714		0.021656		0.565902
Zr-6	GPF-680.60	U2c		5	Zone 2		24.96	0.61	1.54	0.4	1.23	1.7	55.99	2.68	0.05	1.91	1.81	92.88		0.83015	0.0478645	0.0239096	0.901924		0.907984	0.0254417	0.000378392	0.0141339	0.0428288	0.0112675	0.0438288	1.04586		0.190372		1.78266
Zr-6	GPF-680.60	U2c		6	Zone 1		30.43	0.17	0.02	0.05	0.32	0.94	64.2	3.38	0.01	0.6	0.17	100.29		0.944319	0.0246943	0.00621721	0.97523		0.971421	0.0299386	7.06117e-05	0.00414272	0.000518979	0.00131414	0.0106392	1.01805		0.0166832		0.558772
Zr-6	GPF-680.60	U2c		7	Zone 2		23.19	1.12	1.27	0.41	1.46	3.34	53.79	2.24	0	2.67	1.69	91.18		0.781675	0.0953068	0.0444911	0.921473		0.884062	0.0215512	0	0.0200242	0.0357958	0.0117048	0.0527254	1.02586		0.180146		2.47698
Zr-6	GPF-680.60	U2c		9	Zone 1		32.2	0.08	0.05	0	0.06	0.19	61.84	4.16	0	0.39	0.14	99.11		1.00354	0.00501284	0.00293831	1.01149		0.93973	0.0370058	0	0.00270433	0.00130302	0	0.00200342	0.982747		0.0137981		0.361806		992.97		34.15
Zr-6	GPF-680.60	U2c		10	Zone 1		-	-	-	-	-	-	-	-	-	-	-	-		-	-	-	-		-	-	-	-	-	-	-	-		-		-		991.95		39.92
Zr-6	GPF-680.60	U2c		11	Zone 1		-	-	-	-	-	-	-	-	-	-	-	-		-	-	-	-		-	-	-	-	-	-	-	-		-		-		990.41		43.69
Zr-6	GPF-680.60	U2c		12	Zone 2		-	-	-	-	-	-	-	-	-	-	-	-		-	-	-	-		-	-	-	-	-	-	-	-		-		-		992.16		40.85
Zr-6	GPF-680.60	U2c		13	Zone 2		-	-	-	-	-	-	-	-	-	-	-	-		-	-	-	-		-	-	-	-	-	-	-	-		-		-		991.54		34.62
Zr-6	GPF-680.60	U2c		14	Zone 2		-	-	-	-	-	-	-	-	-	-	-	-		-	-	-	-		-	-	-	-	-	-	-	-		-		-		992.68		36.56
Zr-7	GPF-680.60	U2c		1	Zone 1		30.33	0.08	0.04	0.22	0.13	0.25	62.1	2.68	0.05	3.37	0.49	99.74		0.956404	0.00667361	0.00297296	0.96605		0.954808	0.0241214	0.000358756	0.0236438	0.00105471	0.00587552	0.00439192	1.01425		0.0488627		3.13711
Zr-7	GPF-680.60	U2c		2	Zone 1		32.26	0.1	0.11	0.02	0.26	0.69	61.42	4.01	0.04	0.38	0.75	100.04		0.982874	0.0177965	0.00359057	1.00426		0.912429	0.034872	0.000277302	0.00257594	0.00280239	0.000516081	0.0084869	0.961959		0.0722616		0.361116
Zr-7	GPF-680.60	U2c		3	Zone 2		16.56	1.62	0.35	0.44	3.58	10.06	44.76	2.81	0.14	3.97	2.65	86.94		0.564999	0.290561	0.0651377	0.920698		0.744617	0.0273648	0.00108686	0.0301367	0.00998524	0.0127144	0.130862	0.956767		0.285921		3.71305
Zr-7	GPF-680.60	U2c		4	Zone 2		20.38	1.14	0.38	1.08	2.1	5.75	49.32	2.94	0	3.62	2.7	89.41		0.688803	0.164517	0.0454073	0.898727		0.812773	0.028362	0	0.0272218	0.0107393	0.030915	0.0760417	0.986053		0.288581		3.3583
Zr-7	GPF-680.60	U2c		5	Zone 1		31.07	0.01	0.17	0	0.03	0.26	62.56	3.52	0	0.65	0.3	98.57		0.977528	0.0069249	0.000370782	0.984824		0.959711	0.0316103	0	0.00455008	0.00447239	0	0.00101123	1.00136		0.0298485		0.60301		993.47		38.28
Zr-7	GPF-680.60	U2c		6	Zone 1		29.39	0.13	0.98	0.26	0.69	0.17	59.72	3.62	0	1.06	0.76	96.78		0.945563	0.00463012	0.00492906	0.955123		0.936843	0.0332428	0	0.00758778	0.0263645	0.00708466	0.0237839	1.03491		0.0773246		0.983371
Zr-7	GPF-680.60	U2c		7	Zone 2		22.34	1.49	0.64	0.55	2.3	3.68	48.9	2.77	0	3.59	1.77	88.03		0.776841	0.10833	0.0610612	0.946233		0.829113	0.0274933	0	0.0277755	0.0186094	0.0161982	0.0856878	1.00488		0.194641		3.33047		992.09		34.06
Zr-7	GPF-680.60	U2c		8	Zone 1		25.58	0.83	0.34	0.34	1.26	1.83	51.48	2.63	0	4.21	1.44	89.94		0.877881	0.0531665	0.0335694	0.964617		0.861449	0.0257626	0	0.0321466	0.00975702	0.00988255	0.0463285	0.985326		0.156283		3.90565
Zr-7	GPF-680.60	U2c		9	Zone 1		30.21	0.08	0.03	0.02	0.14	0.33	62.98	3.53	0	0.51	0.17	98		0.961731	0.00889342	0.00300139	0.973625		0.9776	0.0320757	0	0.00361236	0.000798596	0.000539247	0.00477499	1.0194		0.0171145		0.473131
Zr-7	GPF-680.60	U2c		10	Zone 1		30.45	0.05	0.24	0.02	0.1	0.18	64.32	3.62	0	0.53	0.52	100.03		0.94886	0.00474831	0.00183618	0.955444		0.977274	0.0321975	0	0.00367459	0.00625359	0.000527836	0.00333854	1.02327		0.0512426		0.491685
Zr-7	GPF-680.60	U2c		11	Zone 2		17.92	0.92	0.54	0.9	3.24	7.95	50.24	4.7	0	1.92	3.58	91.91		0.583578	0.21917	0.0353085	0.838057		0.79775	0.0436875	0	0.0139117	0.0147048	0.0248232	0.113044	1.00792		0.368686		1.7812
Zr-7	GPF-680.60	U2c		12	Zone 1		30.25	0.05	0.13	0.09	0.01	0.12	63.53	5.21	0.06	0.5	0.25	100.2		0.952712	0.00319941	0.00185582	0.957767		0.975598	0.0468352	0.000429979	0.00350368	0.0034236	0.00240067	0.000337426	1.03253		0.0248994		0.476734		993.29		32.57
Zr-8	GPF-680.60	U2c		1	Zone 1		30.66	0.05	0	0.05	0.02	0.06	63.73	6.66	0	0.09	0.3	101.62		0.954113	0.00158063	0.0018337	0.957528		0.967002	0.0591562	0	0.000623144	0	0.00131781	0.000666807	1.02877		0.0295231		0.0834937
Zr-8	GPF-680.60	U2c		2	Zone 2		19.1	1.84	0.36	0.44	2.19	5.69	42.17	6.45	0.17	7.29	1.78	87.48		0.692841	0.174729	0.0786589	0.946229		0.745864	0.0667818	0.00140317	0.0588363	0.0109196	0.0135178	0.0851111	0.982434		0.204189		6.79949
Zr-8	GPF-680.60	U2c		3	Zone 1		31.16	0.12	0.21	0.03	0.1	0.33	61.99	4.74	0.05	0.62	0.03	99.38		0.980725	0.00879257	0.00445104	0.993969		0.951322	0.0425821	0.00035808	0.0043417	0.00552678	0.000799698	0.00337203	1.0083		0.00298596		0.585912
Zr-8	GPF-680.60	U2c		4	Zone 2		19.6	2.1	0.35	0.51	2.75	5.52	48.33	3.01	0	4	3.09	89.26		0.660678	0.157516	0.0834224	0.901616		0.794339	0.02896	0	0.0299993	0.00986517	0.0145599	0.0993135	0.977037		0.329386		3.71083
Zr-8	GPF-680.60	U2c		5	Zone 2		26.22	0.81	1.45	0.34	1.34	0.65	54.73	2.93	0.01	1.9	1.29	91.67		0.887629	0.0186279	0.0323157	0.938573		0.9034	0.0283116	7.70299e-05	0.014311	0.0410459	0.00974838	0.0486011	1.0455		0.138102		1.76479
Zr-8	GPF-680.60	U2c		6	Zone 2		28.72	0.45	1.18	0.26	0.72	0.36	59.72	3.27	0	0.88	0.88	96.44		0.924552	0.00981074	0.0170722	0.951435		0.937395	0.0300465	0	0.006303	0.0317638	0.00708884	0.0248326	1.03743		0.0895865		0.816383
Zr-8	GPF-680.60	U2c		7	Zone 1		31.51	0	0	0	0	0.1	64.22	3.8	0.13	0.78	0	100.54		0.981365	0.00263654	0	0.984002		0.975233	0.0337804	0.000921267	0.00540499	0	0	0	1.01534		0		0.751519
Zr-8	GPF-680.60	U2c		8	Zone 2		29.69	0	0.69	0.17	0.24	0.2	61.05	3.47	0.08	0.77	0.69	97.05		0.951159	0.00542407	0	0.956583		0.95364	0.0317301	0.000583167	0.00548847	0.018484	0.00461261	0.00823752	1.02278		0.0699045		0.731509
Zr-8	GPF-680.60	U2c		9	Zone 1		32.83	0.01	0.07	0	0.01	0.15	62.01	3.85	0.11	0.31	0.5	99.85		1.00626	0.00389211	0.00036122	1.01052		0.926742	0.0336822	0.000767175	0.00211408	0.00179408	0	0.000328385	0.965428		0.0484646		0.311203
Zr-8	GPF-680.60	U2c		10	Zone 2		30.09	0.03	0.6	0.12	0.07	0.12	59.54	3.61	0	0.65	0.55	95.38		0.976021	0.00329511	0.0011468	0.980463		0.941676	0.0334228	0	0.00469103	0.0162739	0.00329665	0.00243264	1.00179		0.0564173		0.60301
* Analyses in italic bold are below the detection limit

## Sheet: Inclusions SEM
Zr name	Sample	Sub-unit	Mineral		SiO2	Al2O3	MgO	FeO	MnO	CaO	Na2O	K2O	F	Li2O*	SOMME		Si	AlIV	Tet. Sum		AlVI	Fe	Mn	Mg	Li*	Oct. Sum	□VI		Ca	Na	K	Int. Sum		F	OH**	F/(F+OH)
Zr-1	GPF-680.60	U2c	Muscovite		52.6646	32.9474	0	3.23333	0.754517	0.981433	0.591609	8.82718	0	0	100		6.93303	1.06697	8		4.04646	0	0.36055	0.148032	0	4.55504	1.44496		0.138439	0.151015	1.48254	1.772		0	4	0
Zr-1	GPF-680.60	U2c	Muscovite		54.0846	31.486	0	3.30987	0	0.806212	0	9.40191	0.911449	0.347977	100.152		7.10631	0.893688	8		3.98357	0	0.368378	0	0.183896	4.53584	1.46416		0.113505	0	1.57604	1.68955		0.378749	3.62125	0.0946873
Zr-2	GPF-598.05	U2e	Muscovite		50.9105	33.9768	0.564382	2.50332	0.12648	1.35288	0	10.5657	0	0	100		6.77331	1.22669	8		4.10254	0.0627975	0.282112	0.0250782	0	4.47252	1.52748		0.192863	0	1.79338	1.98624		0	4	0
Zr-2	GPF-598.05	U2e	Muscovite		52.4962	27.9384	0.828662	7.66963	0.0647454	0.399929	0	10.083	0.519364	0.165067	100.06		7.12958	0.870417	8		3.60286	0.0941214	0.88231	0.0131047	0.0901671	4.68256	1.31744		0.0581986	0	1.74706	1.80526		0.223078	3.77692	0.0557695
Zr-2	GPF-598.05	U2e	Muscovite		52.4655	30.9379	1.80088	1.58106	0.327273	1.52971	0.430813	9.64495	1.28194	0.546985	100.266		6.95679	1.04321	8		3.79309	0.199708	0.17758	0.0646737	0.291717	4.52677	1.47323		0.217339	0.110766	1.63161	1.95972		0.537588	3.46241	0.134397
Zr-2	GPF-598.05	U2e	Muscovite		54.531	30.6325	0.99088	2.61676	0.144998	0.494759	0.0338464	10.0274	0.527839	0.168648	100.062		7.19673	0.803271	8		3.96282	0.109367	0.292527	0.0285191	0.089521	4.48275	1.51725		0.0699648	0.00866132	1.68834	1.76696		0.220314	3.77969	0.0550784
Zr-3	GPF-680.60	U2c	Muscovite		57.3032	27.7595	0.205177	1.15984	0	0.415258	0	10.4991	2.65792	1.43843	100.881		7.43281	0.567194	8		3.67775	0.0222576	0.127433	0	0.750435	4.57788	1.42212		0.0577147	0	1.73743	1.79515		1.09035	2.90965	0.272587
Zr-4	GPF-680.60	U2c	Muscovite		52.6368	34.0644	1.28064	1.52019	0.0722679	0.0461544	0.227053	9.57737	0.575197	0.189	100.071		6.90752	1.09248	8		4.17765	0.140552	0.168983	0.0141338	0.0997576	4.60108	1.39892		0.00648994	0.0577751	1.60347	1.66773		0.238725	3.76127	0.0596813
Zr-4	GPF-680.60	U2c	Muscovite		54.0826	25.2285	0.00467198	5.58948	1.05637	0.119047	0.563765	10.4856	2.86993	1.59251	101		7.22002	0.779979	8		3.19065	0.000521623	0.632067	0.210173	0.855096	4.88851	1.11149		0.0170291	0.145935	1.7859	1.94886		1.21172	2.78828	0.302929
Zr-4	GPF-680.60	U2c	Muscovite		59.3417	23.5225	0	5.24554	1.44891	0	0	10.4414	0	0	100		7.86465	0.135351	8		3.53992	0	0.588872	0.286183	0	4.41498	1.58502		0	0	1.76547	1.76547		0	4	0
Zr-7	GPF-680.60	U2c	Muscovite		57.6426	30.2504	1.86367	1.12247	0	0	0	8.583	0.537898	0.172923	100.064		7.46479	0.535212	8		4.0832	0.201846	0.123129	0	0.0900697	4.49824	1.50176		0	0	1.41806	1.41806		0.220304	3.7797	0.0550761
Zr-7	GPF-680.60	U2c	Muscovite		51.8629	34.9555	0.764401	3.53411	0.202806	1.00585	0	7.67442	0	0	100		6.79881	1.20119	8		4.20112	0.0838056	0.392435	0.0396221	0	4.71698	1.28302		0.141287	0	1.28352	1.42481		0	4	0
Zr-7	GPF-680.60	U2c	Muscovite		56.3003	31.2735	0	2.43301	0	0	0	9.99327	0	0	100		7.34324	0.65676	8		4.15209	0	0.268802	0	0	4.42089	1.57911		0	0	1.6629	1.6629		0	4	0
Zr-8	GPF-680.60	U2c	Muscovite		53.5339	34.9642	0.521077	2.67532	0.071446	0	0	7.99327	0.240844	0.0595836	100.017		6.95066	1.04934	8		4.30255	0.0565815	0.294228	0.0138247	0.0311154	4.6983	1.3017		0	0	1.32405	1.32405		0.0988967	3.9011	0.0247242
Zr-8	GPF-680.60	U2c	Muscovite		52.9969	30.3286	0.418977	2.94353	0.295206	0	0.274484	11.6018	1.14052	0.468452	100.22		7.06365	0.936348	8		3.82927	0.046703	0.332322	0.0586389	0.251128	4.51806	1.48194		0	0.0709377	1.97282	2.04376		0.480764	3.51924	0.120191
Zr-8	GPF-680.60	U2c	Muscovite		53.8574	31.7704	0.794618	4.17251	0.171153	0	0.277829	8.35705	0.599036	0.199456	100.076		7.0824	0.917596	8		4.00784	0.0873914	0.464776	0.0335429	0.105496	4.69905	1.30095		0	0.0708423	1.40207	1.47291		0.249136	3.75086	0.062284
Zr-8	GPF-680.60	U2c	Muscovite		55.6853	30.2516	1.01848	3.00341	0.168487	0	0	9.87272	0	0	100		7.32651	0.67349	8		4.01888	0.112069	0.334721	0.0330372	0	4.49871	1.50129		0	0	1.6572	1.6572		0	4	0
Zr-8	GPF-680.60	U2c	Muscovite		55.3508	32.3075	0.676094	1.93944	0.097078	0	0	8.95849	0.670619	0.23166	100.092		7.19324	0.806759	8		4.14308	0.0734823	0.213495	0.0188019	0.121089	4.56994	1.43006		0	0	1.48531	1.48531		0.275629	3.72437	0.0689073
Zr-3	GPF-680.60	U2c	Quartz		99.5534	0.446627	0	0	0	0	0	0	0	0	100
Zr-3	GPF-680.60	U2c	Quartz		98.9763	0.641867	0	0.0466346	0	0.0191539	0	0.227281	0.0887746	0	100
Zr-5	GPF-598.05	U2e	Quartz		93.0893	0	0	0	2.8879	4.02279	0	0	0	0	100
Zr-7	GPF-680.60	U2c	Quartz		97.5764	0	0	0.642334	0.440032	0.417475	0	0.923736	0	0	100
* Li2O in dioctahedral micas (e.g., muscovite) calculated from the equation of Tischendorf et al. 1997: Li2O (wt%) = 0.3935*F1.326
** OH calculated by stoichiometry

## Sheet: U-Pb zircon
Table 1: U-Pb isotpic results and ages for zircons from Beauvoir granite.
Sample		Composition parameters										Radiogenic isotope ratios																Isotopic ages
		Th		Pb*		Pbc		206Pb		Pbc		208Pb		207Pb		±2σ		207Pb		±2σ		206Pb		±2σ		Corr.		207Pb		±2σ		207Pb		±2σ		206Pb		±2σ		206Pb		±2σ
		U		(pg)		(pg)		204Pb		Pb*		206Pb		206Pb		% err		235U		% err		238U		% err		coef.		206Pb		(abs. Ma)		235U		(abs. Ma)		238U		(abs. Ma)		238U		(abs. Ma)		% disc
		a		b		c		d		e		f		f				f				f						g				g				g				<Th> h				i
352.30m, Beauvoir sub-unit U4b
GPF-35250_z1		0.0260705		78.2402		9.12073		575.875		0.116574		0.00829135		0.0535085		2.56739		0.173014		2.56341		0.0234444		0.275425		0.0384642		351.03		58.0283		162.031		3.83906		149.388		0.40672		149.494		0.406709		57.4429
GPF-35250_z4		0.0131008		84.2744		4.49616		1242.76		0.0533514		0.00414778		0.0532697		1.17708		0.265917		1.18315		0.036204		0.150465		0.100855		340.346		26.6627		239.424		2.52354		229.26		0.338896		229.365		0.338886		32.639
GPF-35250_z5		0.0145058		155.224		10.787		957.72		0.0694933		0.00459064		0.0532952		1.53		0.27532		1.54031		0.0374668		0.236024		0.118706		341.391		34.6451		246.938		3.37642		237.112		0.549473		237.216		0.54946		30.5455
447.60m, Beauvoir sub-unit U3b
GPF-44760_z13		0.0361688		88.3997		5.35981		1087.64		0.0606316		0.0115605		0.0536285		1.33951		0.0814768		1.34329		0.0110071		0.156702		0.0798762		357.895		30.2454		79.5324		1.02758		70.5686		0.10998		70.6754		0.109975		80.2823
GPF-44760_z35		0.0125863		39.7872		2.31454		1141.01		0.0581728		0.00401816		0.0535427		1.29232		0.100924		1.29845		0.01366		0.168184		0.0986928		353.636		29.2023		97.6287		1.20862		87.4621		0.146104		87.5693		0.146095		75.2678
GPF-44760_z39		0.148523		17.4249		2.23906		505.587		0.128498		0.0471901		0.0544113		2.88798		0.195397		2.88189		0.0260407		0.309222		0.0333167		388.496		64.8432		181.224		4.78314		165.721		0.505915		165.822		0.505917		57.3431
598.05m, Beauvoir sub-unit U2e
GPF-59805_z1		0.0585395		6.60745		4.11046		120.796		0.622095		0.018814		0.0558155		13.2875		0.0282784		13.2342		0.00365953		1.38346		0.0133277		454.112		294.937		28.315		3.69548		23.5478		0.325179		23.6546		0.325182		94.8145
GPF-59805_z2		0.00628627		345.726		15.2828		1500.01		0.0442049		0.00198907		0.0528029		1.07041		0.27643		4.07981		0.0379689		3.93354		0.964936		320.326		24.3346		247.822		8.97135		240.231		9.27567		240.336		9.27552		25.0043
GPF-59805_z4		0.0155327		15.2144		1.77975		575.771		0.116978		0.0049829		0.0532389		2.5874		0.0383561		2.58477		0.00521072		0.271188		0.0418786		345.279		58.5407		38.2178		0.969483		33.5032		0.090621		33.6112		0.090613		90.2968
GPF-59805_z6		0.0049903		113.989		2.07816		3618.84		0.0182312		0.00159468		0.0512173		0.4267		0.0812949		0.449967		0.0115001		0.0964144		0.330319		252.964		9.84192		79.3616		0.343502		73.7116		0.0706638		73.8193		0.0706605		70.8608
GPF-59805_z7		0.0102929		17.0361		1.22629		927.491		0.0719816		0.0032928		0.0518956		1.63444		0.066321		1.63784		0.009256		0.182142		0.0724564		283.95		37.3906		65.2022		1.03434		59.3936		0.107684		59.5013		0.107676		79.0831
GPF-59805_z12		0.478241		27.5685		82.8281		35.7801		3.00444		0.152849		0.0992717		42.615		0.146867		41.9711		0.0107202		7.76601		0.00878358		1612.17		793.935		139.142		54.5748		68.7389		5.30991		68.8321		5.31091		95.7363
GPF-59805_z13		0.00789275		30.4359		1.92811		1052.07		0.06335		0.00252482		0.0520819		1.42941		0.0674329		2.2016		0.00937774		1.67804		0.760427		292.086		32.6542		66.2605		1.41221		60.1711		1.005		60.2789		1.00498		79.3995
GPF-59805_z14		0.0170005		15.8069		2.68666		401.755		0.169967		0.00545981		0.0525768		3.80428		0.0306094		3.79561		0.00420746		0.383379		0.0273215		318.636		86.4782		30.614		1.14465		27.0661		0.103548		27.1742		0.10354		91.5056
GPF-59805_z18		0.00961148		65.8688		4.29031		1022.6		0.0651342		0.00307072		0.0527307		1.45069		0.0871764		1.45375		0.0119789		0.165287		0.0731284		319.403		32.9788		84.8696		1.18363		76.7623		0.126126		76.8697		0.126119		75.967
GPF-59805_z20		0.0110113		31.5737		1.73401		1209.21		0.0549193		0.00352088		0.0525691		1.23221		0.0742305		1.30365		0.0102289		0.433256		0.32561		312.968		28.047		72.706		0.914696		65.605		0.282796		65.7126		0.282789		79.0378
GPF-59805_z22		0.0322594		77.2261		12.72		411.56		0.164711		0.0102994		0.0544303		3.56481		0.101376		3.57733		0.0134974		0.558506		0.100111		390.671		80.0082		98.0456		3.3434		86.4277		0.479482		86.5343		0.479473		77.8771
GPF-59805_z24		0.0386345		5.74045		1.22705		320.312		0.213754		0.0124154		0.0549941		4.64588		0.0285357		4.6379		0.00374829		0.486582		0.0356673		420.929		103.72		28.569		1.30653		24.1178		0.117134		24.2253		0.117126		94.2703
GPF-59805_z26		0.00450408		416.963		4.66369		5881.23		0.0111849		0.00142322		0.0525948		0.261852		0.304208		0.327369		0.0419514		0.162715		0.601092		311.251		6.00504		269.682		0.775339		264.917		0.422323		265.022		0.422315		14.8863
GPF-59805_z30		0.00874352		18.0642		1.00336		1197.87		0.0555445		0.00279821		0.0514343		1.28571		0.0608698		1.29188		0.00857016		0.152707		0.0968004		263.827		29.5227		59.9982		0.752649		55.0114		0.083649		55.1192		0.0836418		79.1487
680.60m, Beauvoir sub-unit U2c
GPF-68060_z7		0.142802		1.05719		1.46977		62.2082		1.39026		0.0450639		0.0649086		26.4822		0.40988		26.3204		0.0458031		3.20321		0.0101657		771.176		557.455		348.789		77.6959		288.703		9.04375		288.803		9.0437		62.5632
GPF-68060_z12		0.0176569		1.60153		0.742366		158.057		0.463537		0.00558475		0.0548534		10.07		0.295625		10.0603		0.0390881		1.22613		0.0529726		406.208		225.385		262.977		23.3078		247.178		2.97336		247.282		2.9733		39.1499
GPF-68060_z30		0.013139		30.4254		2.26459		896.174		0.074431		0.00420825		0.0525844		1.66028		0.0527728		1.66328		0.00726509		0.194014		0.0720713		315.156		37.7701		52.2186		0.846587		46.6645		0.0902089		46.7723		0.090203		85.1932
GPF-68060_z31		0.00581171		58.4413		2.65164		1462.71		0.0453728		0.00185666		0.0522603		1.03529		0.0872431		1.0437		0.0120962		0.132454		0.122925		298.972		23.6271		84.932		0.850376		77.509		0.102049		77.6166		0.102042		74.0748
784.73m, Beauvoir sub-unit U1b
GPF-78473_z1		0.0270272		85.1354		3.59524		1558.99		0.0422297		0.00860874		0.0531883		0.93993		0.141922		0.950483		0.0193441		0.134241		0.144699		337.794		21.305		134.754		1.19946		123.509		0.164221		123.615		0.164215		63.4365
GPF-78473_z2		0.0130889		17.0911		1.32963		857.064		0.0777965		0.00419258		0.053966		1.70046		0.053089		1.70119		0.00712116		0.191574		0.0584449		373.948		38.2826		52.5235		0.870808		45.7433		0.0873219		45.8511		0.0873161		87.7675
GPF-78473_z3		0.00576063		218.517		2.84423		5054.99		0.013016		0.00182384		0.0524581		0.302427		0.262066		0.344203		0.0362317		0.121941		0.486523		305.476		6.92965		236.331		0.725727		229.433		0.274853		229.538		0.274847		24.8933
GPF-78473_z4		0.00554394		83.8931		1.66544		3320.19		0.019852		0.00175281		0.0525782		0.452705		0.291851		0.473129		0.0402593		0.0960668		0.29806		310.576		10.3312		260.015		1.08532		254.44		0.239671		254.544		0.239665		18.0748
GPF-78473_z5		0.00515649		207.819		2.68942		5083.91		0.0129412		0.00162795		0.052707		0.301274		0.32359		0.334303		0.0445302		0.0959078		0.454553		316.051		6.89054		284.66		0.829875		280.852		0.263576		280.957		0.26357		11.137
824.20m, Beauvoir sub-unit U1a
GPF-82420_z6		0.0138909		102.254		3.96305		1700.2		0.0387571		0.00441097		0.0554773		1.66707		0.212164		1.67613		0.0277324		0.588601		0.190297		431.863		37.1537		195.367		2.97886		176.34		1.02387		176.446		1.02381		59.1675
GPF-82420_z7		0.00452528		1270.82		11.3261		7376.11		0.00891239		0.00142989		0.0526272		0.213058		0.304801		0.260335		0.0420074		0.0978258		0.606808		312.649		4.90347		270.144		0.617497		265.264		0.25423		265.369		0.254225		15.1561
GPF-82420_z10		0.0197434		1.09189		1.37638		69.2253		1.26055		0.00625263		0.0524813		28.3884		0.256101		28.3791		0.0353912		3.46947		0.0584154		306.496		646.688		231.52		58.7511		224.202		7.64491		224.307		7.64475		26.85
GPF-82420_z13		0.000684809		25.3123		1.54162		1096.37		0.0609037		0.000219397		0.0516924		1.40404		0.0489694		2.21522		0.00685681		1.68038		0.77354		276.441		32.1622		48.5436		1.05005		44.051		0.737698		44.1592		0.737681		84.065
GPF-82420_z18		0.00271884		132.234		4.3871		1996.19		0.0331768		0.000872875		0.0519632		0.761569		0.0323376		0.779633		0.0044986		0.135673		0.213866		291.333		17.4107		32.3153		0.247974		28.9348		0.0391687		29.0433		0.0391632		90.0681
860.25m, Beauvoir microgranite (µG)
GPF-86025_z4		0.042989		43.7968		1.77312		1618.5		0.0404852		0.013644		0.0527056		0.91691		0.211949		0.931564		0.029162		0.156616		0.173311		316.431		20.863		195.187		1.6542		185.302		0.286081		185.406		0.286073		41.4401
GPF-86025_z20		0.0297435		39.087		8.00098		334.637		0.204697		0.00947639		0.0550535		4.38227		0.141707		4.36584		0.0186599		0.459353		0.0164404		415.405		97.9284		134.563		5.50217		119.181		0.542431		119.287		0.54242		71.3098
GPF-86025_z24		0.0930598		50.834		6.14626		545.057		0.120908		0.0294491		0.0538916		2.69591		0.279228		2.6906		0.0375786		0.293309		0.0356935		366.504		60.7661		250.045		5.96335		237.806		0.684799		237.909		0.684791		35.115
a Th contents calculated from radiogenic 208Pb and 230Th-corrected 206Pb/238U date of the sample, assuming concordance between U-Pb Th-Pb systems.
b Total mass of radiogenic Pb.
c Total mass of common Pb.
d Measured ratio corrected for fractionation and spike contribution only.
e Ratio of common lead to radiogenic Pb (including 208Pb).
f Measured ratios corrected for fractionation, tracer, blank and, where applicable, initial common Pb.
g Isotopic dates calculated using λ238 = 1.55125E-10 (Jaffey et al. 1971) and λ235 = 9.8485E-10 (Jaffey et al. 1971).
h Corrected for initial Th/U disequilibrium using radiogenic 208Pb and Th/U[magma] = 3.50000.
i % discordance = 100 - (100 * (206Pb/238U date) / (207Pb/206Pb date))

## Sheet: U-Pb apatite
Table 2: U-Pb isotopic results and ages for apatites from Beauvoir granite.
Sample		Composition parameters								Radiogenic isotopic ratios																Isotopic ages																Radiogenic + initial Pb isotopic ratios
		Th		Pbc		Pb*		Pbc		206Pb		208Pb		206Pb				207Pb				207Pb				206Pb		±2σ		207Pb		±2σ		207Pb		±2σ		Corr.				238Pb				207Pb
		U		Pb*		(pg)		(pg)		204Pb		206Pb		238U		±2σ %		235U		±2σ %		206Pb		±2σ %		238U		abs		235U		abs		206Pb		abs		coef.		% disc		206Pb		±2σ %		206U		±2σ %
		a		b		c		d		e		f		f				f				f				<Th> g				<Th> g				<Th> g						i
447.60m, Beauvoir sub-unit U3b
GPF-44760_ap1		11.0694		0.781865		413.147		323.025		39.1227		3.49274		0.0497734		1.81362		0.44391		6.29539		0.064713		6.33551		313.13		5.5361		373.006		19.652		764.073		133.516		0.121614		59.0182		10.608		0.209627		0.432649		0.117768
GPF-44760_ap3		1.09091		0.532277		523.518		278.657		117.819		0.344259		0.0493809		0.392145		0.357781		1.69905		0.0525718		1.6604		310.72		1.18802		310.557		4.54595		309.334		37.8046		0.212807		-0.447802		17.0819		0.0993323		0.17645		0.149754
598.05m, Beauvoir sub-unit U2e
GPF-59805_ap1		0.232547		0.266081		178.287		47.4388		265.307		0.0731959		0.0578754		0.176301		0.423317		0.756693		0.0530719		0.707557		362.692		0.621088		358.42		2.28514		330.853		16.0482		0.386886		-9.62337		16.1009		0.1194		0.10699		0.59513
GPF-59805_ap2		0.318594		0.280271		155.12		43.4755		247.251		0.100408		0.0536896		0.188572		0.392043		0.827784		0.0529831		0.777521		337.134		0.618665		335.861		2.36716		327.055		17.647		0.373067		-3.08181		17.2662		0.132521		0.110731		0.668802
GPF-59805_ap3		0.161207		0.57511		84.4562		48.5716		135.008		0.0512031		0.0260816		0.335721		0.189952		1.59783		0.0528449		1.54166		165.978		0.548722		176.588		2.58985		321.122		35.0273		0.269879		48.3132		33.1953		0.186053		0.15906		0.719608
GPF-59805_ap4		0.223121		0.26245		219.498		57.6074		269.717		0.0689997		0.115023		0.288209		0.838058		0.791282		0.0528671		0.708148		701.851		1.91556		618.073		3.66333		322.073		16.0868		0.455495		-117.917		8.10875		0.25356		0.106134		0.489137
784.73m, Beauvoir sub-unit U1b
GPF-78473_ap1		0.184389		0.297301		1596.16		474.54		242.452		0.0582299		0.046943		0.19495		0.342191		0.788936		0.0528923		0.74389		295.726		0.562721		298.831		2.04233		323.157		16.8954		0.348622		8.48833		19.6805		0.0902819		0.113142		0.10138
GPF-78473_ap2		0.43972		0.389223		339.177		132.016		177.884		0.138746		0.0497802		0.254491		0.36383		1.07884		0.0530318		1.03639		313.172		0.776941		315.07		2.92232		329.136		23.5136		0.281672		4.85038		18.0154		0.0990382		0.134676		0.255241
GPF-78473_ap3		0.155234		0.256148		541.224		138.633		280.594		0.0489907		0.0491332		0.171891		0.359012		0.632933		0.0530186		0.589315		309.198		0.518258		311.477		1.69775		328.571		13.3718		0.381527		5.8963		19.0213		0.0909888		0.104781		0.211887
GPF-78473_ap4		0.268581		0.253734		487.601		123.721		274.716		0.0847446		0.04983		0.176742		0.363578		0.644417		0.052942		0.600674		313.478		0.540093		314.882		1.74467		325.292		13.6375		0.376865		3.63182		18.7285		0.0964682		0.105768		0.235957
824.20m, Beauvoir sub-unit U1a
GPF-82420_ap1		0.712587		0.306595		234.812		71.9922		207.122		0.224828		0.0500138		0.219146		0.3642		0.850146		0.0528378		0.812144		314.606		0.672028		315.346		2.30455		320.814		18.4534		0.298603		1.93501		18.2346		0.111611		0.122493		0.433178
GPF-82420_ap2		0.216987		0.404591		384.979		155.759		181.513		0.0684572		0.0502239		0.249615		0.367691		0.945838		0.053121		0.913496		315.896		0.76853		317.941		2.58191		332.949		20.7115		0.259292		5.12165		17.8949		0.0950989		0.133219		0.218995
GPF-82420_ap3		0.343659		0.353248		152.793		53.9737		198.738		0.108302		0.0538664		0.229283		0.394105		0.92883		0.053087		0.886967		338.215		0.754582		337.364		2.66614		331.497		20.1152		0.302098		-2.02683		16.8699		0.134935		0.125304		0.582398
GPF-82420_ap4		0.275413		0.36679		713.162		261.581		195.39		0.0868593		0.0513872		0.234175		0.376098		0.876654		0.0531055		0.842542		323.033		0.736901		324.163		2.43282		332.287		19.105		0.276435		2.78496		17.6248		0.0917787		0.127716		0.14414
860.25m, Beauvoir µGranite
GPF-86025_ap1		0.222481		0.459019		684.197		314.06		161.995		0.0701867		0.0503987		0.281367		0.36724		1.18913		0.0528719		1.14818		316.969		0.869167		317.606		3.24314		322.281		26.0818		0.261439		1.64804		17.5831		0.0949949		0.142956		0.133498
GPF-86025_ap2		0.242504		0.324013		780.823		252.997		220.585		0.0765058		0.0502975		0.213522		0.368484		0.889706		0.0531577		0.843782		316.348		0.658324		318.529		2.43251		334.515		19.1255		0.329935		5.43097		18.2212		0.0957658		0.119229		0.145209
GPF-86025_ap3		0.23915		0.513484		322.876		165.792		146.144		0.0754032		0.0522496		0.310166		0.382636		1.33314		0.053137		1.29191		328.318		0.991617		328.976		3.74614		333.632		29.2875		0.247261		1.5926		16.7308		0.0996474		0.152675		0.219472
GPF-86025_ap4		0.38143		0.396499		461.084		182.819		177.43		0.120356		0.0497102		0.254295		0.363486		0.964614		0.0530563		0.933458		312.742		0.775299		314.814		2.61108		330.184		21.1745		0.25231		5.28258		18.0309		0.0910633		0.135087		0.192303
a Th contents calculated from radiogenic 208Pb and 230Th-corrected 206Pb/238U date of the sample, assuming concordance between U-Pb Th-Pb systems.
b Ratio of common lead (Pbc) to radiogenic lead (Pb*).
c Total mass of Pb*
d Total mass of Pbc.
e Measured ratio corrected for fractionation and spike contribution only.
f Measured ratios corrected for fractionation, tracer, blank and, where applicable, initial common Pb.
g Corrected for initial Th/U disequilibrium using radiogenic 208Pb and Th/U[magma] = 3.50000.
h Isotopic dates calculated using λ238 = 1.55125E-10 (Jaffey et al. 1971) and λ235 = 9.8485E-10 (Jaffey et al. 1971).
i % discordance = 100 - (100 * (206Pb/238U date) / (207Pb/206Pb date))
[truncated: 16 more columns]

## Sheet: Zircon α-decay damage
		Zone 1 Zircon			Zone 2 Zircon					α-decays.mg-1
Time before present (year)		U (µg.g-1)	Th (µg.g-1)		U (µg.g-1)	Th (µg.g-1)		Time since zircon crystallisation (year)		Zone 1		Zone 2
0		8050	205		28056	159		313000000		8472267352782559		2.93927e+16
10000000		8062.98	205.101		28101.2	159.079		303000000		8206772086628157		2.84717e+16
20000000		8075.99	205.203		28146.6	159.157		293000000		7940952497009139		2.75495e+16
30000000		8089.02	205.304		28192	159.236		283000000		7674806757227661		2.66262e+16
40000000		8102.07	205.406		28237.5	159.315		273000000		7408333040840299		2.57018e+16
50000000		8115.15	205.508		28283.1	159.394		263000000		7141529521540238		2.47762e+16
60000000		8128.26	205.609		28328.8	159.473		253000000		6874394373039193		2.38495e+16
70000000		8141.39	205.711		28374.5	159.552		243000000		6606925768949123		2.29216e+16
80000000		8154.55	205.813		28420.4	159.631		233000000		6339121882663749		2.19925e+16
90000000		8167.73	205.915		28466.3	159.71		223000000		6070980887239624		2.10623e+16
100000000		8180.94	206.017		28512.4	159.789		213000000		5802500955277122		2.01309e+16
110000000		8194.18	206.119		28558.5	159.868		203000000		5533680258800845		1.91983e+16
120000000		8207.44	206.221		28604.7	159.947		193000000		5264516969139996		1.82645e+16
130000000		8220.72	206.323		28651	160.026		183000000		4995009256808331		1.73295e+16
140000000		8234.03	206.425		28697.4	160.105		173000000		4725155291383524		1.63933e+16
150000000		8247.37	206.527		28743.9	160.184		163000000		4.45495e+15		1.54559e+16
160000000		8260.74	206.629		28790.5	160.264		153000000		4.1844e+15		1.45173e+16
170000000		8274.13	206.731		28837.1	160.343		143000000		3913497555750656		1.35775e+16
180000000		8287.54	206.834		28883.9	160.422		133000000		3.64224e+15		1.26364e+16
190000000		8300.99	206.936		28930.7	160.502		123000000		3370627522322378		1.16941e+16
200000000		8314.46	207.039		28977.7	160.581		113000000		3098657531796795		1.07505e+16
210000000		8327.95	207.141		29024.7	160.661		103000000		2.82633e+15		9805716558384234
220000000		8341.48	207.244		29071.9	160.74		93000000		2553638401117587		8859657721148459
230000000		8355.03	207.346		29119.1	160.82		83000000		2280585574348786		7912336625600623
240000000		8368.61	207.449		29166.4	160.899		73000000		2.00717e+15		6963746837390083
250000000		8382.21	207.551		29213.8	160.979		63000000		1.73338e+15		6013881914198870
260000000		8395.84	207.654		29261.3	161.059		53000000		1.45923e+15		5062735405304360
270000000		8409.5	207.757		29308.9	161.138		43000000		1.18471e+15		4.1103e+15
280000000		8423.19	207.86		29356.6	161.218		33000000		9.09815e+14		3.15657e+15
290000000		8436.9	207.962		29404.4	161.298		23000000		6.34546e+14		2.20154e+15
300000000		8450.64	208.065		29452.3	161.378		13000000		3.58902e+14		1.2452e+15
310000000		8464.41	208.168		29500.3	161.457		3000000		8.28805e+13		2.87553e+14
313000000		8468.55	208.199		29514.7	161.481		0		0		0
λ238U (Jaffey et al., 1971)		1.55125e-10
λ235U (Jaffey et al., 1971)		9.8485e-10
λ232Th (Le Roux & Glendenin, 1963)		4.9475e-11
Mass 238U		238.051
Mass 235U		235.044
Mass 232Th		232.038
Avogadro Number		6.02214e+23
