# Supplementary material for: The magmatic–hydrothermal transition record in zircon: implications for zircon texture, composition and rare-metal granite dating (Beauvoir granite, French Massif Central)
Source: Copernicus journal article supplement (doi:10.5194/ejm-37-667-2025), 2025-10-07
Supplement: Supplementary file [file ejm-37-667-2025-supplement-title-page.pdf › ejm-37-667-2025-supplement-title-page.pdf]

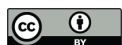

## *Supplement of*

# **The magmatic–hydrothermal transition record in zircon: implications for zircon texture, composition and rare-metal granite dating (Beauvoir granite, French Massif Central)**

**Nicolas Esteves et al.**

*Correspondence to:* Nicolas Esteves ([nicolas.esteves@univ-lorraine.fr](mailto:nicolas.esteves@univ-lorraine.fr))

- [ejm-37-667-2025-supplement-title-page.pdf](#)
- [Supplementary figures.pdf](#)
- [Supplementary materials.xlsx](#)

The copyright of individual parts of the supplement might differ from the article licence.
